## 1 Wastewater Surveillance for Monkeypox Virus in Nine California Communities

2

3 Marlene K. Wolfe<sup>1#\*</sup>, Alexander T. Yu<sup>2\*</sup>, Dorothea Duong<sup>3</sup>, Madhura S. Rane<sup>2</sup>, Bridgette Hughes<sup>3</sup>,  
4 Vikram Chan-Herur<sup>3</sup>, Marisa Donnelly<sup>2,4</sup>, Shua Chai<sup>2,4</sup>, Bradley J. White<sup>3</sup>, Duc J. Vugia<sup>2</sup>, Alexandria B.  
5 Boehm<sup>5#</sup>

6

7 1. Gangarosa Department of Environmental Health, Rollins School of Public Health, Emory  
8 University, Atlanta, GA, USA, 30322

9 2. California Department of Public Health, Richmond, CA, USA, 94804

10 3. Verily Life Sciences, South San Francisco, CA, USA, 94080

11 4. Centers for Disease Control and Prevention, Atlanta, GA, USA, 30333

12 5. Department of Civil & Environmental Engineering, Stanford University, Stanford, CA, USA,  
13 94305

14

15 \* These authors contributed equally to this work

16

17 # Corresponding authors:

18 Marlene Wolfe, [marlene.wolfe@emory.edu](mailto:marlene.wolfe@emory.edu)

19 Alexandria Boehm, [aboehm@stanford.edu](mailto:aboehm@stanford.edu)

20

### 21 Abstract

22 Background: Wastewater represents a composite biological sample from the entire contributing  
23 population. People infected with monkeypox virus (MPXV)<sup>1</sup> may excrete viral DNA into wastewater  
24 via multiple ways such as in feces, urine, skin lesions, and/or saliva. We describe results from rapid  
25 establishment of wastewater surveillance in selected regions in California within a month of the first  
26 reported case of monkeypox in the United States. Methods: PCR assays targeting genomic DNA from  
27 MPXV were deployed in an ongoing wastewater surveillance program in California. MPXV DNA  
28 concentrations were measured daily in settled solids samples from nine wastewater plants. Results  
29 over a four-week period were validated across different MPXV assays, compared using influent and  
30 solids samples, and correlated using non-parametric methods (Kendall's tau) with the number of  
31 monkeypox cases reported from each sewershed. Results: MPXV DNA was detected at all nine sites  
32 between June 19 and August 1, 2022; 5 of 9 sites detected MPXV DNA prior to or within a day of the  
33 first case identified in the source sewershed. At the four sites with >10 positive detections, we  
34 observed a positive, statistically significant correlation ( $p < 0.001$ ) between MPXV DNA in wastewater  
35 solids and incidence rate of reported cases. Conclusions: Our findings suggest wastewater can be  
36 used to effectively detect the introduction of MPXV and monitor its circulation in the community to  
37 inform public health and clinical response. This flexible wastewater surveillance infrastructure may be  
38 rapidly leveraged to monitor other pathogens of public health importance that are shed into  
39 wastewater.

40

41

42 Introduction

43 Monkeypox virus (MPXV), of the *Orthopoxvirus* genus in the family *Poxviridae*, is endemic in Western  
44 and Central Africa where infection has been linked to transmission from infected animals or humans.  
45 Sporadic cases and outbreaks linked to travel or imported animals have been recognized in non-  
46 endemic countries since the first identification of human disease in 1970<sup>1</sup>. In May 2022, cases of  
47 monkeypox infection without association to endemic areas were reported in multiple European  
48 countries<sup>1</sup>. Within weeks, cases were identified in the United States and a dozen countries around the  
49 world. By late July, the World Health Organization declared monkeypox a public health emergency of  
50 international concern<sup>2</sup>. Unlike previous outbreaks, this global outbreak is driven by human-to-human  
51 transmission and cases without association to each other have been identified, suggesting additional  
52 undetected community transmission<sup>3,4</sup>.

53  
54 Since recognition of the global outbreak, there has been a rapid scale-up of public health response,  
55 including substantial increases in testing and efforts to educate clinicians and the public to mitigate  
56 spread<sup>5</sup>. However, surveillance is dependent on practical access to and utilization of testing, limited  
57 by awareness of a disease that is novel to the general public and most clinicians, stigma of a disease  
58 that has to date primarily been diagnosed in gay, bisexual, and other men who have sex with men,  
59 and the potential for asymptomatic cases<sup>6,7</sup>. Alternative public health surveillance approaches  
60 independent of individual testing, such as wastewater surveillance, provide an attractive means to  
61 detect and track emerging monkeypox transmission and provide situational awareness for public  
62 health agencies and clinicians.

63  
64 Use of wastewater surveillance to monitor trends in infectious diseases has grown rapidly.  
65 Wastewater represents a composite biological sample combining inputs from community members  
66 connected to a sewer network and many pathogens are shed in ways that reliably end up in  
67 wastewater, including in urine, feces, oral and nasal secretions, and sloughing of skin. Wastewater  
68 surveillance has been reliably used by public health agencies throughout the coronavirus disease  
69 2019 (COVID-19) pandemic to monitor for SARS-CoV-2, the causative virus of COVID-19.  
70 Concentrations of SARS-CoV-2 viral RNA are strongly correlated with COVID-19 case incidence<sup>8-10</sup>,  
71 and recent studies show this is also the case for other respiratory viruses such as Influenza A and  
72 respiratory syncytial virus<sup>11,12</sup>.

73  
74 Recent small observational studies of monkeypox infection have confirmed the presence of viral DNA  
75 for some individuals in saliva, feces, urine, semen, and/or skin lesions<sup>13,14</sup>. Although concentrations of  
76 viral DNA in specimens were not reported, Cq values (a measurement of how many cycles are needed  
77 to detect a signal) from quantitative polymerase chain reaction (PCR) measurements were low,  
78 suggesting high concentrations of MPXV DNA even 16 days after symptom onset<sup>13</sup>. These data are  
79 consistent with reports of MPXV shedding from previous outbreaks in humans<sup>15</sup> and experimental  
80 studies in animals<sup>16-19</sup>. Related viruses including smallpox have been shown to be excreted in urine<sup>20</sup>.  
81 Together, this evidence suggests that MPXV DNA is likely to appear in wastewater. Based on a  
82 systematic review of the literature<sup>21</sup>, no study to date has documented the persistence of  
83 orthopoxviruses in wastewater. However, Vaccinia virus has been reported to persist for days in raw  
84 freshwater and marine waters<sup>21</sup>, suggesting orthopoxviruses may persist as wastewater transits from  
85 homes to nearby wastewater treatment plants.

86

87 In a collaborative effort between researchers running a wastewater surveillance program and the  
88 California Department of Public Health (CDPH), we rapidly adapted and deployed an assay for  
89 surveillance of MPXV DNA in multiple sewersheds in California. We describe results from this work,  
90 including the establishment of monitoring within a month of the first reported case of monkeypox in  
91 the US and an exploration of the relationship between MPXV DNA concentrations in wastewater and  
92 cases in the community.

93

## 94 Methods

95

96 *MPXV Molecular Assay.* To detect MPXV DNA in wastewater, we used assays developed by the United  
97 States Centers for Disease Control and Prevention (CDC)<sup>22</sup>. The G2R\_G assay, which targets a region  
98 of the OPG002 gene common to all MPXV sequences, was used on all samples. A subset of samples  
99 (described further below) was also assayed for MPXV DNA using the G2R\_WA assay which targets a  
100 separate region of the OPG002 gene that is specific to Clade II. The choice of assays was confirmed by  
101 alignment with sequences from the 2022 outbreak.

102

103 *Wastewater samples for MPXV surveillance.* Each day between June 19, 2022 and August 1, 2022,  
104 settled solids were collected from nine publicly owned treatment works (POTWs) in California in the  
105 Greater San Francisco Bay and Sacramento areas (Table 1, S1). The POTWs treat wastewater from  
106 between 66,622 and 1,480,00 people; details of the POTWs and specific sample collection processes  
107 are provided in Wolfe et al.<sup>8</sup> Samples were couriered to a laboratory the same day they were  
108 collected and processed immediately, unless otherwise specified (Table S2), with results available  
109 within 24 hours of sample collection. A total of 407 solids samples were included in this study.

110

111 At the laboratory, nucleic acids were extracted and purified from the solids using previously  
112 published methods<sup>8,23-25</sup> (see SI for additional details). Nucleic acids were used undiluted as template  
113 in digital droplet PCR wells; 10 replicate wells were run per sample and results from the wells were  
114 merged to determine the concentration of the G2R\_G target. PCR cycling conditions and further  
115 details of digital droplet PCR (ddPCR) are provided in the SI. We also measured pepper mild mottle  
116 virus (PMMoV) RNA gene concentrations; as well as recovery of spiked-in bovine coronavirus (BCoV)  
117 RNA following methods outlined elsewhere<sup>23-25</sup>. Additionally, negative and positive extraction  
118 controls, and negative and positive PCR controls were included in each plate. Gene fragments were  
119 used as controls for the G2R\_G assay; other controls are described elsewhere<sup>8</sup>. Nucleic acids were  
120 not stored prior to analysis, with the exception of some from a POTW serving the part of San  
121 Francisco (SEP) which were stored at -80°C less than two weeks and subjected to a freeze thaw prior  
122 to G2R\_G analysis (Table S2).

123

124 A subset of samples with the highest concentrations of G2R\_G detection from the two POTWs with  
125 the most frequent G2R\_G (OSP and SEP, Table S2) detections were processed for the second MPXV  
126 genomic target, G2R\_WA, using the same replication and QA/QC as described for G2R\_G. A gene  
127 fragment was used as the G2R\_WA positive control. PCR cycling conditions are provided in the SI.

128

129 *Liquid influent samples.* Samples of 24-h composited influent were collected in sterile containers on  
130 ~7 consecutive days (Table S2) from two POTWs (OSP and SEP) that had the highest rates of detection  
131 of the G2R\_G target to compare the concentrations obtained using liquid wastewater to those

132 obtained using settled solids. Methodological details are in the SI. In brief, viral targets were  
133 concentrated from wastewater influent using Nanotrap particles (Ceres Nanosciences, Manassas, VA)  
134 before nucleic acids were extracted, purified, and used as template in digital droplet PCR to measure  
135 concentrations of G2R\_G and G2R\_WA targets, as well as PMMoV and BCoV recovery following the  
136 same protocol as described for solids.

137  
138 *Case Data.* Counts of incident cases of monkeypox, defined in this study as people with lesion swabs  
139 PCR positive for orthopoxvirus or MPXVs, were recorded as a function of episode date (symptom  
140 onset date, or if not available, the earliest of laboratory result or case record creation date) and  
141 report date (laboratory result date or, if not available, case record create date). Cases were  
142 aggregated within sewersheds based on georeferenced home addresses, delineated using POTW-  
143 specific GIS shape files. To obtain daily incidence rates of monkeypox, a 7-day rolling average of  
144 incident cases per 100,000 population was calculated using the estimated population served in each  
145 sewershed (Table S1). To explore incidence of cases of monkeypox at the time MPXV DNA was first  
146 detected in wastewater at each sewershed, we compared incidence during periods with no MPXV  
147 detection (any 7-day period without detection in wastewater) with the period of first detection (first  
148 7-day period with at least 2 detections in wastewater). Weekly incidence of cases of monkeypox was  
149 estimated for each of these periods (all cases with an episode date within 7-day periods of no  
150 detection of MPXV DNA, or all cases within the 7-day period leading up to the date of first detection  
151 of MPXV DNA, divided by total sewershed population). Since the goal was to describe upper limits of  
152 incidence of monkeypox cases in each sewershed when MPXV DNA was not detected in wastewater,  
153 for sewersheds with multiple 7-day periods without detection of MPXV DNA in wastewater, the single  
154 highest weekly incidence of cases of monkeypox was used.

155  
156 *Statistical analysis.* We assessed the association between the moving 5-day trimmed (highest and  
157 lowest of the 5 values excluded) average of MPXV DNA concentrations in wastewater solids and 7-  
158 day moving averages of monkeypox daily incidence using Kendall's tau for the subset of sites for  
159 which both variables had more than 10 values (out of ~44) greater than 0 to ensure both variables  
160 had sufficient variance. Tests were repeated using the MPXV DNA concentrations in wastewater  
161 normalized by PMMoV, and for both the episode date and report date associated with cases. Non-  
162 parametric methods were chosen as data were not normally distributed (Shapiro-Wilk test). We also  
163 assessed the relationship between MPXV DNA concentrations in measurements taken from liquid and  
164 solids samples and the relationship between results from the G2R\_G and G2R\_WA assays on the  
165 same sample using Kendall's tau. A paired Wilcoxon Sign Rank test was then used to assess the  
166 difference in results between liquids and solids, and between the G2R\_G and G2R\_WA assays used on  
167 the same samples. All statistical analysis was performed in RStudio (version 2021.09.2).

168 ab

169 This activity was reviewed by CDC and was conducted consistent with applicable federal law and CDC  
170 policy.§

171

## 172 Results

173 MPXV DNA was detected in wastewater samples across all sites (9/9) monitored during the study  
174 period from June 19 to August 1, 2022 (Table 1, Fig 1, Fig 2, Fig S4). Concentrations of MPXV DNA  
175 (G2R\_G target) ranged from non-detect to 24,113 copies/g dry weight of wastewater solids (more  
176 about lowest detectable concentration in SI). Positive and negative controls were all positive and

177 negative respectively, BCoV recoveries were higher than 10%, and PMMoV concentrations were  
178 within an expected range for each POTW. This indicates assays performed efficiently and  
179 demonstrated no evidence of contamination. A subset of samples was run with a second assay  
180 (G2R\_WA, specific to Clade II of MPXV) and no significant difference between measurements of  
181 G2R\_WA and G2R\_G were observed (details in SI). A comparison of results from liquid and solids  
182 samples showed a significant association (Kendall's tau = 0.52, n = 28, p = 0.00012), with significantly  
183 higher concentration in solids (about  $10^3$  higher) on a per mass basis (Wilcoxon signed rank test, n =  
184 28, p<0.001) (Fig 3). Further details are in the SI.

185  
186 The first clinical monkeypox case in any of the study areas was reported in the Sacramento  
187 sewershed on May 23, 2022; wastewater monitoring for MPXV began on June 19 (Table 1). The first  
188 wastewater samples to test positive were June 20 samples from each of the two facilities serving San  
189 Francisco (OSP, SEP). Daily samples from these sites were sporadically positive for the following 1-2  
190 weeks, after which samples were consistently positive in increased concentrations (Fig 1, Fig 2, Fig  
191 S4). The next sites to test positive were SJ (June 25), and SAC (July 3). These sites also had a pattern of  
192 sporadic positives followed by increasing rates of positive samples and concentrations. Samples from  
193 SUN, PA, Gil, Dav, and SVCW also tested positive; SVCW and PA had some increase in rates of positive  
194 samples.

195  
196 During the study period, the total number of cases in each sewershed ranged from 0 (Dav) to 494  
197 (SEP). In SJ, Gil, and Dav, a first positive detection in wastewater preceded the report of a first case of  
198 monkeypox. During periods with no detection in wastewater, the highest weekly incidence recorded  
199 at each sewershed was an average of 0.68 cases (median 0.65, range 0-1.28) per 100,000. The  
200 average weekly incidence when a sewershed first had at least 2 detections in 7 days was 1.14  
201 (median 0.95, range 0.89-2.01) per 100,000.

202  
203 At the four sites with >10 positive samples and days with cases, there was a significant, positive  
204 association between the 5-day trimmed average concentration of viral DNA in wastewater and the 7-  
205 day average monkeypox incidence rate in the corresponding sewershed both when cases were  
206 compared using episode date (Kendall's tau = 0.59, p <0.001, n = 176) and report date (Kendall's tau =  
207 0.66, p <0.001, n = 130). Results were similar when wastewater data were normalized by PMMoV and  
208 with raw, daily concentrations from wastewater (Table S4).

## 209 210 Discussion

211 Surveillance for infectious diseases is a core function to inform public health, clinical, and general  
212 public understanding of risk and strategies for prevention of disease and is especially important for  
213 emerging infectious diseases. In the current global monkeypox outbreak, localized detection of  
214 disease introduction and circulation informs public health and clinical response, allows appropriate  
215 allocation of scarce testing, therapeutic and vaccine resources, and is important for risk messaging to  
216 the public. Traditional case surveillance for monkeypox is dependent on confirmatory PCR diagnostic  
217 testing of cases. While such testing is important for clinical decision making and is the backbone of  
218 disease surveillance, limitations include variable disease recognition, variable care-seeking due to  
219 disease severity and stigma, testing availability, and clinician awareness. Complementary strategies  
220 that can overcome these limitations and provide rapid population level awareness, like wastewater  
221 surveillance, can be vital for public health response.

222

223 We found that an established wastewater surveillance infrastructure could be rapidly leveraged to  
224 detect and monitor MPXV DNA to inform public health response. MPXV DNA was consistently  
225 detectable in wastewater from sewersheds with confirmed cases, even in locations with few  
226 identified cases. In some places, detections in wastewater preceded identification of the first cases in  
227 the community. We also found that the level of viral DNA in wastewater correlated with monkeypox  
228 incidence rate, suggesting that wastewater surveillance is a viable methodology to monitor trends in  
229 monkeypox disease activity. These findings suggest that wastewater surveillance can be adopted  
230 where feasible as an adjunct public health tool in the current global outbreak to monitor monkeypox  
231 disease activity, including in areas without known cases.

232

233 It is not yet possible to translate the concentration of MPXV DNA in wastewater to a predicted  
234 number of cases in the sewershed. One important reason is the unclear understanding of the true  
235 case incidence in each sewershed. However, comparisons between the weekly case incidence at the  
236 time of first consistent detections in wastewater (at least two detections within a 7-day period), and  
237 the weekly incidence during 7-day periods of no detection suggest that the beginning of consistent  
238 detections in wastewater correspond to a weekly incidence of at least 0.89-2.01 cases per 100,000.  
239 This is a likely underestimate, with true cases under-reported due to the reasons discussed above.  
240 One sewershed (Dav) had one positive wastewater sample but no reported cases; this likely reflects  
241 unidentified case(s) in residents or visitors.

242

243 There was a higher association between wastewater concentration and case incidence by report  
244 date, as compared to episode date (primarily reflecting symptom onset date). This suggests both that  
245 wastewater surveillance results appear timely relative to when cases are known to public health, as  
246 well as a lag between symptom onset and detection of MPXV DNA in wastewater, potentially  
247 reflecting delayed viral shedding into wastewater. Further research on MPXV shedding is necessary to  
248 describe how viral shedding may affect lag and vary by disease severity, and to improve estimates of  
249 the number of cases based on a wastewater concentration.

250

251 Wastewater samples regularly collected for routine public health monitoring can be tested for new  
252 targets with minimal change in processes. Our findings suggest wastewater can be used to effectively  
253 monitor for the introduction of MPXV and track its circulation for public health, clinical, and public  
254 awareness. The rapid adaptation of wastewater surveillance infrastructure to effectively monitor a  
255 non-enteric, non-respiratory virus such as MPXV, is promising for the future use of this tool for  
256 emerging infectious diseases of public health concern. Increased and sustained investment is needed  
257 to build wastewater surveillance infrastructure and for it to be ready to adapt rapidly to meet new  
258 and emerging public health needs.

259

260

261 *Acknowledgements.* This work is supported by a gift from the CDC Foundation. Numerous people  
262 contributed to sample collection, including Srividhya Ramamoorthy (Sac), Michael Cook (Sac), Ursula  
263 Bigler (Sac), James Noss (Sac), Lisa C. Thompson (Sac), Payal Sarkar (SJ), Ryan Batjiaka (OSP and SEP),  
264 Melanie Wong (SEP), Lily Chan (Ocean), the Oceanside and Southeast plant operations personnel,  
265 Karin North (PA), Armando Guizar (PA), Saeid Vaziry (Gil), Chris Vasquez (Gil), Alo Kauravlla (Sun),  
266 Maria Gawat (SVCW), Tiffany Ishaya (SVCW), Eric Hansen (SVCW), and Jeromy Miller (Dav). We  
267 acknowledge Robert Snyder at California Department of Public Health and Caroline Sheikzadeh from  
268 Emory University for their assistance. This study was performed on the ancestral and unceded lands  
269 of the Muwekma Ohlone people. We pay our respects to them and their Elders, past and present,  
270 and are grateful for the opportunity to live and work here.

271

272 Dorothea Duong, Bridgette Hughes, Vikram Chan-Herur, and Bradley White are employees of Verily  
273 Life Sciences.

274

275

276 *Disclaimer:* The findings and conclusions in this report are those of the authors and do not necessarily  
277 represent the official positions of the California Department of Public Health or the California Health  
278 and Human Services Agency.

279

280 *Disclaimer:* The findings and conclusions in this report are those of the authors and do not necessarily  
281 represent the official positions of the Centers for Disease Control and Prevention.

282

283 §See e.g., 45 C.F.R. part 46, 21 C.F.R. part 56; 42 U.S.C. §241(d); 5 U.S.C. §552a; 44 U.S.C. §3501 et  
284 seq.

285

286  
287  
288  
289  
290  
291  
292  
293  
294  
295  
296

**Table 1. First cases of monkeypox and first detection of monkeypox virus (MPXV) DNA in wastewater by sewershed, California.**

Sewersheds serviced by publicly owned treatment works (POTWs): SJ (San Jose), PA (Palo Alto), Gil (Gilroy), Sun (Sunnyvale), SVCW (Silicon Valley Clean Water), OSP (Oceanside, San Francisco), SEP (Southeast, San Francisco), Sac (Sacramento), Dav (Davis). Symptom onset date of the first case in each sewershed was available and thus reported. Total cases using episode date (symptom onset date, or if not available, the earliest of laboratory result or case record creation date) and report date are noted separately for each sewershed within the study period (June 19 to August 1, 2022).

| Sewershed | Symptom onset date of first case | Report date of first case | First detection date in wastewater | Total cases, by episode date | Total cases, by report date |
|-----------|----------------------------------|---------------------------|------------------------------------|------------------------------|-----------------------------|
| SJ        | 6/22/22                          | 6/29/22                   | 6/25/22                            | 74                           | 59                          |
| PA        | 6/16/22                          | 6/22/22                   | 7/15/22                            | 6                            | 6                           |
| Gil       | 7/3/22                           | 7/11/22                   | 6/27/22                            | 1                            | 1                           |
| Sun       | 7/2/22                           | 7/8/22                    | 7/9/22                             | 5                            | 5                           |
| SVCW      | 7/20/22                          | 7/20/22                   | 7/21/22                            | 5                            | 4                           |
| OSP       | 5/29/22                          | 6/10/22                   | 6/20/22                            | 36                           | 30                          |
| SEP       | 5/30/22                          | 6/3/22                    | 6/20/22                            | 494                          | 442                         |
| SAC       | 5/12/22                          | 5/23/22                   | 7/3/22                             | 82                           | 67                          |
| Dav       | n/a                              | n/a                       | 6/27/22                            | 0                            | 0                           |

297  
298  
299



300 **Figure 1. Monkeypox DNA detection in wastewater solids by sewershed.**

301 Heatmap of positive and negative results from all publicly owned treatment works (POTWs): SJ (San  
302 Jose), PA (Palo Alto), Gil (Gilroy), Sun (Sunnyvale), SVCW (Silicon Valley Clean Water), OSP (Oceanside,  
303 San Francisco), SEP (Southeast, San Francisco), Sac (Sacramento), Dav (Davis). Red indicates a positive  
304 detection, green indicates a negative detection. White indicates no sample collected.  
305

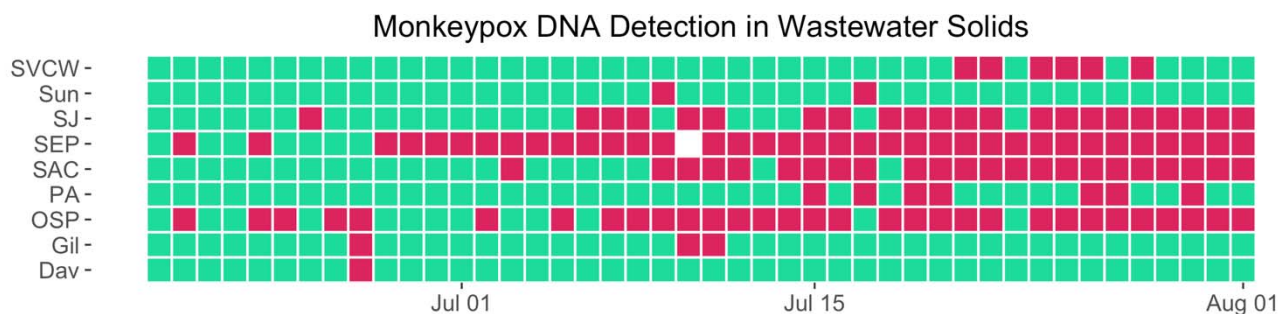

306  
307  
308

309 **Figure 2. Wastewater monkeypox virus (MPXV) concentrations and incidence of monkeypox cases**  
310 **by sewershed.**

311 Top row: Time series of wastewater concentrations (concentration of MPXV DNA normalized by  
312 concentration of PMMoV RNA) at select publicly owned treatment works (POTWs) with >10 positive  
313 detections during the study time period: SEP (Southeast, San Francisco), OSP (Oceanside, San  
314 Francisco), Sac (Sacramento), and SJ (San Jose). The area under the curve represents the 5 day  
315 trimmed average of MPXV DNA cp/g over PMMoV cp/g in wastewater. Points represent daily values;  
316 open circles indicate non-detects. Error bars represent standard deviations and include Poisson error  
317 and variability among the 10 replicates (68% confidence intervals reported by the instrument  
318 software as “total error”). Bottom row: Daily incidence rate (IR) or monkeypox cases, averaged over  
319 7-days, using episode date (red) and report date (green).  
320

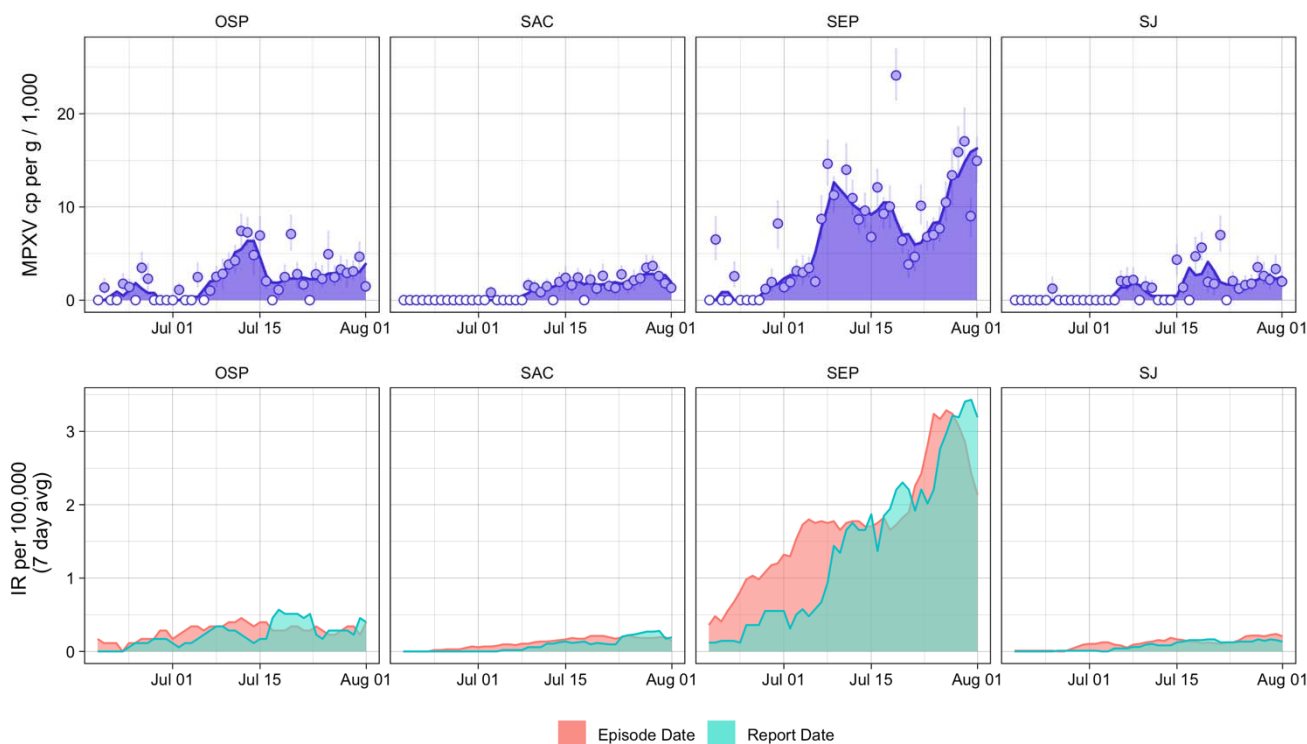

321  
322

323

324 **Figure 3. Concentrations of monkeypox virus (MPXV) in wastewater solids and liquid influent by**  
325 **assay.**

326 Concentrations of G2R\_G and G2R\_WA in wastewater solids and liquid influent at OSP (Oceanside,  
327 San Francisco) and SEP (Southeast, San Francisco) POTWs. Units are per gram for measurements  
328 using wastewater solids, and per mL for measurements from liquid wastewater.

329

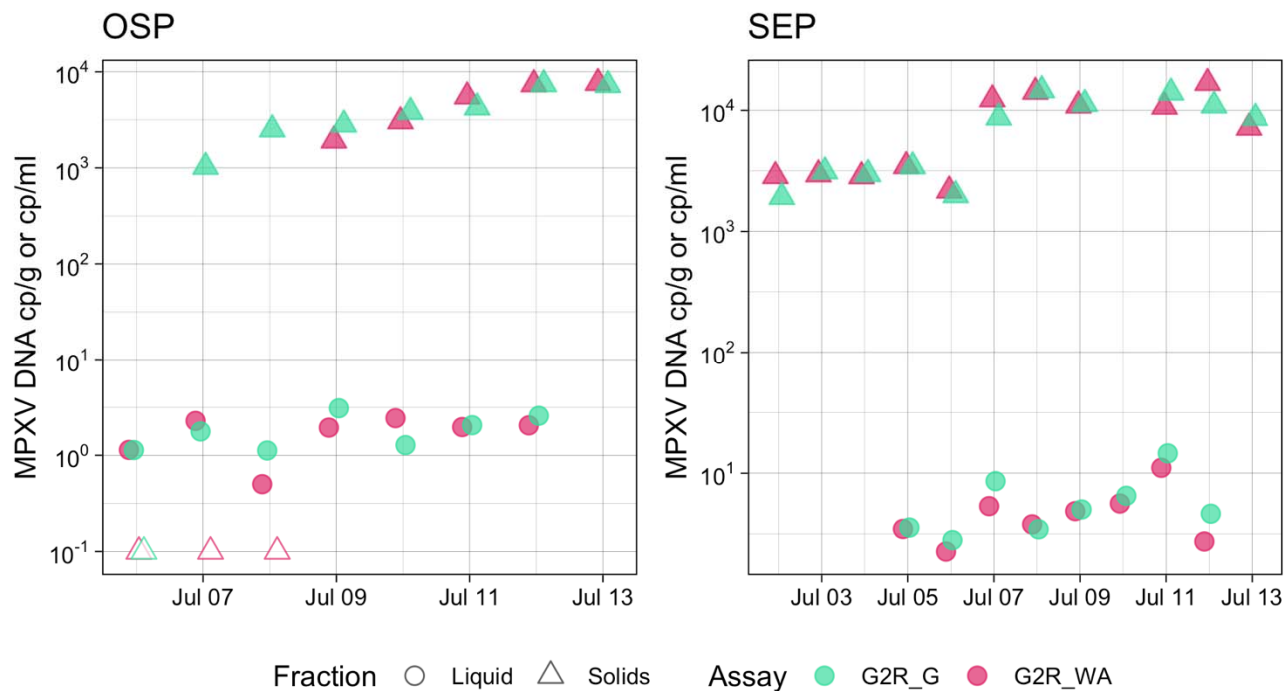

330

331

332

333 **References**

334

335 1. Kraemer MUG, Tegally H, Pigott DM, et al. Tracking the 2022 monkeypox outbreak with  
336 epidemiological data in real-time. *Lancet Infect Dis* 2022;22(7):941–2.

337 2. Second meeting of the International Health Regulations (2005) (IHR) Emergency Committee  
338 regarding the multi-country outbreak of monkeypox [Internet]. [cited 2022 Jul 29];Available  
339 from: [https://www.who.int/news/item/23-07-2022-second-meeting-of-the-international-](https://www.who.int/news/item/23-07-2022-second-meeting-of-the-international-health-regulations-(2005)-(ihr)-emergency-committee-regarding-the-multi-country-outbreak-of-monkeypox)  
340 [health-regulations-\(2005\)-\(ihr\)-emergency-committee-regarding-the-multi-country-outbreak-of-](https://www.who.int/news/item/23-07-2022-second-meeting-of-the-international-health-regulations-(2005)-(ihr)-emergency-committee-regarding-the-multi-country-outbreak-of-monkeypox)  
341 [monkeypox](https://www.who.int/news/item/23-07-2022-second-meeting-of-the-international-health-regulations-(2005)-(ihr)-emergency-committee-regarding-the-multi-country-outbreak-of-monkeypox)

342 3. Minhaj FS. Monkeypox Outbreak — Nine States, May 2022. *MMWR Morb Mortal Wkly Rep*  
343 [Internet] 2022 [cited 2022 Jul 23];71. Available from:  
344 <https://www.cdc.gov/mmwr/volumes/71/wr/mm7123e1.htm>

345 4. Thornhill JP, Barkati S, Walmsley S, et al. Monkeypox Virus Infection in Humans across 16  
346 Countries — April–June 2022. *N Engl J Med* 2022;0(0):null.

347 5. Aden TA. Rapid Diagnostic Testing for Response to the Monkeypox Outbreak — Laboratory  
348 Response Network, United States, May 17–June 30, 2022. *MMWR Morb Mortal Wkly Rep*  
349 [Internet] 2022 [cited 2022 Jul 23];71. Available from:  
350 <https://www.cdc.gov/mmwr/volumes/71/wr/mm7128e1.htm>

351 6. Baetselier ID, Dijck CV, Kenyon C, et al. Asymptomatic monkeypox virus infections among male  
352 sexual health clinic attendees in Belgium [Internet]. 2022 [cited 2022 Jul

- 353 29];2022.07.04.22277226. Available from:  
354 <https://www.medrxiv.org/content/10.1101/2022.07.04.22277226v1>
- 355 7. Guagliardo SAJ, Monroe B, Moundjoa C, et al. Asymptomatic Orthopoxvirus Circulation in  
356 Humans in the Wake of a Monkeypox Outbreak among Chimpanzees in Cameroon. *Am J Trop*  
357 *Med Hyg* 2020;102(1):206–12.
- 358 8. Wolfe MK, Topol A, Knudson A, et al. High-Frequency, High-Throughput Quantification of SARS-  
359 CoV-2 RNA in Wastewater Settled Solids at Eight Publicly Owned Treatment Works in Northern  
360 California Shows Strong Association with COVID-19 Incidence. *mSystems* 6(5):e00829-21.
- 361 9. Peccia J, Zulli A, Brackney DE, et al. Measurement of SARS-CoV-2 RNA in wastewater tracks  
362 community infection dynamics. *Nat Biotechnol* 2020;38(10):1164–7.
- 363 10. D’Aoust PM, Mercier E, Montpetit D, et al. Quantitative analysis of SARS-CoV-2 RNA from  
364 wastewater solids in communities with low COVID-19 incidence and prevalence. *Water Res*  
365 2021;188:116560.
- 366 11. Respiratory Syncytial Virus (RSV) RNA in Wastewater Settled Solids Reflects RSV Clinical Positivity  
367 Rates | *Environmental Science & Technology Letters* [Internet]. [cited 2022 Feb 10];Available  
368 from: <https://pubs.acs.org/doi/10.1021/acs.estlett.1c00963>
- 369 12. Wolfe MK, Duong D, Bakker KM, et al. Wastewater-Based Detection of Two Influenza Outbreaks.  
370 *Environ Sci Technol Lett* [Internet] 2022 [cited 2022 Jul 24];Available from:  
371 <https://doi.org/10.1021/acs.estlett.2c00350>

- 372 13. Peiró-Mestres A, Fuertes I, Camprubí-Ferrer D, et al. Frequent detection of monkeypox virus  
373 DNA in saliva, semen, and other clinical samples from 12 patients, Barcelona, Spain, May to June  
374 2022. *Eurosurveillance* 2022;27(28):2200503.
- 375 14. Antinori A, Mazzotta V, Vita S, et al. Epidemiological, clinical and virological characteristics of  
376 four cases of monkeypox support transmission through sexual contact, Italy, May 2022.  
377 *Eurosurveillance* 2022;27(22):2200421.
- 378 15. Adler H, Gould S, Hine P, et al. Clinical features and management of human monkeypox: a  
379 retrospective observational study in the UK. *Lancet Infect Dis* 2022;22(8):1153–62.
- 380 16. Hutson CL, Nakazawa YJ, Self J, et al. Laboratory Investigations of African Pouched Rats  
381 (*Cricetomys gambianus*) as a Potential Reservoir Host Species for Monkeypox Virus. *PLoS Negl*  
382 *Trop Dis* 2015;9(10):e0004013.
- 383 17. Falendysz EA, Lopera JG, Doty JB, et al. Characterization of Monkeypox virus infection in African  
384 rope squirrels (*Funisciurus* sp.). *PLoS Negl Trop Dis* 2017;11(8):e0005809.
- 385 18. Falendysz EA, Lopera JG, Lorenzsonn F, et al. Further Assessment of Monkeypox Virus Infection  
386 in Gambian Pouched Rats (*Cricetomys gambianus*) Using In Vivo Bioluminescent Imaging. *PLoS*  
387 *Negl Trop Dis* 2015;9(10):e0004130.
- 388 19. Hutson CL, Olson VA, Carroll DS, et al. A prairie dog animal model of systemic orthopoxvirus  
389 disease using West African and Congo Basin strains of monkeypox virus. *J Gen Virol* 90(2):323–  
390 33.

- 391 20. Sarkar JK, Mitra AC, Mukherjee MK, De SK, Mazumdar DG. Virus excretion in smallpox. Bull  
392 World Health Organ 1973;48(5):517–22.
- 393 21. Silverman AI, Boehm AB. Systematic Review and Meta-Analysis of the Persistence of Enveloped  
394 Viruses in Environmental Waters and Wastewater in the Absence of Disinfectants. Environ Sci  
395 Technol 2021;55(21):14480–93.
- 396 22. Li Y, Zhao H, Wilkins K, Hughes C, Damon IK. Real-time PCR assays for the specific detection of  
397 monkeypox virus West African and Congo Basin strain DNA. J Virol Methods 2010;169(1):223–7.
- 398 23. Topol A, Wolfe M, White B, Wigginton K, Boehm AB. High Throughput pre-analytical processing  
399 of wastewater settled solids for SARS-CoV-2 RNA analyses [Internet]. protocols.io. 2021 [cited  
400 2022 Jul 25];Available from: [https://www.protocols.io/view/high-throughput-pre-analytical-  
401 processing-of-waste-b2kmqcu6](https://www.protocols.io/view/high-throughput-pre-analytical-processing-of-waste-b2kmqcu6)
- 402 24. Topol A, Wolfe M, Wigginton K, White B, Boehm A. High Throughput RNA Extraction and PCR  
403 Inhibitor Removal of Settled Solids for Wastewater Surveillance of S... [Internet]. protocols.io.  
404 2021 [cited 2022 Jul 25];Available from: [https://www.protocols.io/view/high-throughput-rna-  
405 extraction-and-pcr-inhibitor-r-b2mkqc4w](https://www.protocols.io/view/high-throughput-rna-extraction-and-pcr-inhibitor-r-b2mkqc4w)
- 406 25. Sciences) AT (Verily L, University) MW (Stanford, Sciences) BW (Verily L, Michigan) KW (Univ,  
407 Boehm AB. High Throughput SARS-COV-2, PMMOV, and BCoV quantification in settled solids  
408 using digital RT-PCR [Internet]. protocols.io. 2021 [cited 2022 Jul 25];Available from:  
409 [https://www.protocols.io/view/high-throughput-sars-cov-2-pmmov-and-bcov-quantifi-  
411 b2mjqc4n](https://www.protocols.io/view/high-throughput-sars-cov-2-pmmov-and-bcov-quantifi-<br/>410 b2mjqc4n)
